## **Title: Outcomes of laboratory-confirmed SARS-CoV-2 infection in the Omicron-driven fourth wave compared with previous waves in the Western Cape Province, South Africa**

### **Authors**

Mary-Ann Davies<sup>1,2,3</sup>, Reshma Kassanje<sup>2</sup>, Petro Rosseau<sup>4</sup>, Erna Morden<sup>1,3</sup>, Leigh Johnson<sup>2</sup>, Wesley Solomon<sup>4</sup>, Nei-Yuan Hsiao<sup>5,6</sup>, Hannah Hussey<sup>1,3</sup>, Graeme Meintjes<sup>7,8</sup>, Masudah Paleker<sup>1,9</sup>, Theuns Jacobs<sup>1</sup>, Peter Raubenheimer<sup>7,8</sup>, Alexa Heekes<sup>1,2</sup>, Pierre Dane<sup>1,2</sup>, Jamy-Lee Bam<sup>1</sup>, Mariette Smith<sup>1,2</sup>, Wolfgang Preiser<sup>6,10</sup>, David Pienaar<sup>11</sup>, Marc Mendelson<sup>7,8</sup>, Jonathan Naude<sup>12</sup>, Neshaad Schrueder<sup>13,14</sup>, Ayanda Mnguni<sup>15</sup>, Sue Le Roux<sup>7,8</sup>, Katie Murie<sup>17</sup>, Hans Prozesky<sup>13,14</sup>, Hassan Mahomed<sup>9,18</sup>, Liezel Rossouw<sup>17</sup>, Sean Wasserman<sup>7,8</sup>, Deborah Maughan<sup>7,8</sup>, Linda Boloko<sup>7,8</sup>, Barry Smith<sup>7,8</sup>, Jantjie Taljaard<sup>13,14</sup>, Greg Symons<sup>7,8</sup>, Ntobeko Ntusi<sup>7,8</sup>, Arifa Parker<sup>13,14</sup>, Nicole Wolter<sup>19</sup>, Waasila Jassat<sup>19</sup>, Cheryl Cohen<sup>19,20</sup>, Richard Lessells<sup>21</sup>, Robert J Wilkinson<sup>22,23,23</sup>, Juanita Arendse<sup>17</sup>, Saadiq Kariem<sup>17</sup>, Melvin Moodley<sup>1</sup>, Krish Vallabhjee<sup>17</sup>, Milani Wolmarans<sup>4</sup>, Keith Cloete<sup>17</sup>, Andrew Boulle<sup>1,2,3</sup>

On behalf of the Western Cape and South African National Departments of Health in collaboration with the National Institute for Communicable Diseases in South Africa

## Affiliations

- 1 Health Intelligence, Western Cape Government: Health, South Africa
- 2 Centre for Infectious Disease Epidemiology and Research, School of Public Health and Family Medicine, University of Cape Town, South Africa
- 3 Division of Public Health Medicine, School of Public Health and Family Medicine, University of Cape Town
- 4 National Department of Health, South Africa
- 5 Division of Medical Virology, University of Cape Town, Cape Town, Western Cape, South Africa
- 6 National Health Laboratory Service, South Africa
- 7 Groote Schuur Hospital, Western Cape Government: Health
- 8 Department of Medicine, University of Cape Town
- 9 Division of Health Systems and Public Health, Department of Global Health, Faculty of Medicine and Health Sciences, Stellenbosch University
- 10 Division of Medical Virology, University of Stellenbosch, South Africa
- 11 Rural Health Services, Western Cape Government: Health
- 12 Mitchells Plain Hospital, Western Cape Government: Health
- 13 Tygerberg Hospital, Western Cape Government: Health
- 14 Department of Medicine, Stellenbosch University, South Africa
- 15 Khayelitsha District Hospital, Western Cape Government: Health
- 16 Karl Bremer Hospital, Western Cape Government: Health
- 17 Western Cape Government: Health, South Africa
- 18 Metro Health Services, Western Cape Government: Health
- 19 National Institute for Communicable Diseases, National Health Laboratory Service, South Africa
- 20 School of Public Health, Faculty of Health Sciences, University of the Witwatersrand, Johannesburg, South Africa
- 21 KwaZulu-Natal Research, Innovation & Sequencing Platform, University of KwaZulu-Natal, Durban, South Africa
- 22 The Francis Crick Institute, Midland Road, London, NW1 1AT, UK
- 23 Department of Infectious Diseases, Imperial College London, W12 0NN, UK
- 24 Wellcome Centre for Infectious Disease Research in Africa, Institute of Infectious Disease and Molecular Medicine, University of Cape Town, South Africa

**Corresponding author:**

Mary-Ann Davies

Affiliation: Health Impact Assessment Directorate, Western Cape Government: Health and Centre for Infectious Disease Epidemiology and Research,  
School of Public Health and Family Medicine, University of Cape Town, South Africa.

**Email:** [mary-ann.davies@uct.ac.za](mailto:mary-ann.davies@uct.ac.za)

**Telephone:** +27 21 4066051

**Address:** University of Cape Town, Faculty of Health Sciences, Anzio Road,  
Observatory, 7925, CAPE TOWN, SOUTH AFRICA

**Abstract:** 248 of maximum 250 words

**Manuscript:** 3273 of maximum 3500 words

**Keywords:** COVID-19, Omicron, Delta, sub-Saharan Africa, vaccination, prior infection, immunity

## Abstract

*Objectives:* We aimed to compare COVID-19 outcomes in the Omicron-driven fourth wave with prior waves in the Western Cape, the contribution of undiagnosed prior infection to differences in outcomes in a context of high seroprevalence due to prior infection, and whether protection against severe disease conferred by prior infection and/or vaccination was maintained.

*Methods:* In this cohort study, we included public sector patients aged  $\geq 20$  years with a laboratory confirmed COVID-19 diagnosis between 14 November-11 December 2021 (wave four) and equivalent prior wave periods. We compared the risk between waves of the following outcomes using Cox regression: death, severe hospitalization or death and any hospitalization or death (all  $\leq 14$  days after diagnosis) adjusted for age, sex, comorbidities, geography, vaccination and prior infection.

*Results:* We included 5,144 patients from wave four and 11,609 from prior waves. Risk of all outcomes was lower in wave four compared to the Delta-driven wave three (adjusted Hazard Ratio (aHR) [95% confidence interval (CI)] for death 0.27 [0.19; 0.38]. Risk reduction was lower when adjusting for vaccination and prior diagnosed infection (aHR:0.41, 95% CI: 0.29; 0.59) and reduced further when accounting for unascertained prior infections (aHR: 0.72). Vaccine protection was maintained in wave four (aHR for outcome of death: 0.24; 95% CI: 0.10; 0.58).

*Conclusions:* In the Omicron-driven wave, severe COVID-19 outcomes were reduced mostly due to protection conferred by prior infection and/or vaccination, but intrinsically reduced virulence may account for an approximately 25% reduced risk of severe hospitalization or death compared to Delta.

## Background

Following the identification and early spread of the Omicron (B.1.529) SARS-CoV-2 variant of concern (VOC) during November 2021, South Africa observed the steepest surge in COVID-19 cases to date (1, 2). With more than 50 mutations across its genome, *in vitro*, *ex vivo* and modeling studies have uncovered potential changes in the biology of Omicron compared to previous VOCs, such as tropism, immune escape and improved transmissibility (3-8).

South Africa had previously experienced three COVID-19 waves related to different SARS-CoV-2 variants (ancestral strain, Beta and Delta respectively), each more clinically severe than the previous one with substantial mortality (9, 10). These waves have resulted in high seroprevalence of ~70% from prior infection, especially in poorer communities where social distancing is challenging (11, 12). While such high seroprevalence came at the cost of exceptionally high mortality during the first wave of COVID-19, these areas were relatively protected from both infections and severe disease in subsequent waves (13). For example, in the large urban township of Khayelitsha, the poorest subdistrict in Cape Town, anti-nucleocapsid antibody seroprevalence resulting from prior infection was 45% by the end of wave one (11), increasing to >70% by the end of wave three (Hsiao, NY., personal communication). Unlike the relatively small and slow waves two and three, evidence of immune escape from infection with Omicron is clearly illustrated by the steep rise in cases in Khayelitsha in wave four, similar to that of wave one, in comparison to waves two and three (Figure 1).

While there is emerging biological evidence of possible lower virulence of Omicron compared to previous variants due to modified cell entry mechanisms and preferential replication in bronchi rather than the lung parenchyma (6, 7, 14, 15), even a virus resulting in

similar or lower clinical severity to earlier variants could overwhelm health services if protection conferred by prior COVID-19 infection and/or SARS-CoV-2 vaccination against severe disease is reduced. While there are now several reports from South Africa and other countries of reduced risk of severe disease in the fourth wave and in patients infected with Omicron compared to Delta (16-21) in the context of a high seroprevalence setting such as South Africa, with moderate SARS-CoV-2 vaccination coverage (39% and 46% of adults fully vaccinated in South Africa and the Western Cape respectively by end December 2021) (22), it is important to establish whether protection against severe disease conferred by prior infection and/or vaccination is maintained against Omicron. Furthermore, to what extent does such protection account for milder clinical presentation of Omicron cases versus inherent differences in virulence of Omicron itself compared to previous variants? Such comparisons should not be limited to Delta, which was itself more severe than previous variants (23-26), and should fully account for the increased proportion of reinfections in an immune escape variant such as Omicron compared to other variants (18, 27). While Omicron's immune evasion allows for vaccine breakthroughs and reinfections, if protection against severe disease conferred by prior infection and/or vaccination is maintained, population data should reflect milder clinical illness due to a higher proportion of Omicron cases with reinfections/breakthroughs compared to cases of variants without escape from immunity against infection (18, 27).

We compared outcomes of laboratory-confirmed SARS-CoV-2 infections across four successive waves in those aged  $\geq 20$  years using public sector services in the Western Cape Province, South Africa, accounting for prior infection and vaccination. We also assessed whether protection against severe disease conferred by prior diagnosed infections and/or vaccination was maintained in those infected during the Omicron-driven fourth wave, and

examined the extent to which undiagnosed prior infection may account for observed reductions in clinical severity during the Omicron wave.

## **Methods:**

### *Study design*

We conducted a cohort study using de-identified data from the Western Cape Provincial Health Data Centre (WCPHDC) of public sector patients aged  $\geq 20$  years with a laboratory confirmed COVID-19 diagnosis (positive SARS-CoV-2 PCR or antigen test). For this analysis, each wave was deemed to commence on the date when COVID-19 hospital admissions in public sector patients showed a sustained  $>10\%$  week-on-week increase. We included cases diagnosed from seven days before the wave start (to account for the lag between infection/first symptoms and hospitalization) and for the following four weeks, to allow for at least 2 weeks of follow up in the most recently diagnosed patients in wave four. We thus included data for the 4<sup>th</sup> wave on cases from 14 November to 11 December 2021, with follow-up through to 26 December 2021, which corresponds to the period when omicron rapidly became the dominant variant in the province accounting for nearly 100% of sequenced cases.(2) Database closure was ten days later to allow for death reporting delays. For the first wave, since there were no prior admissions, we selected a period where case incidence was the same as that at the start of wave 4.

The study was approved by the University of Cape Town and Stellenbosch University Health Research Ethics Committees and Western Cape Government: Health. Individual informed consent requirement was waived for this secondary analysis of de-identified data.

### *Study population and data sources*

The Western Cape has nearly 7 million inhabitants, of whom approximately 75% use public sector health services (28). The WCPHDC has been described in detail (10, 29). Briefly, WCPHDC consolidates administrative, laboratory, and pharmacy data from routine electronic clinical information systems used in all public sector health facilities with linkage through a unique identifier. Multiple data sources are triangulated to enumerate health conditions such as diabetes mellitus (“diabetes”), hypertension, tuberculosis and HIV-1. Hospitalizations (private and public) and reported deaths with a positive SARS-CoV-2 laboratory test are recorded and reviewed daily. For patients with recorded South African national identity numbers, data are linked to the South African vital registry to identify deaths not recorded in the WCPHDC. SARS-CoV-2 vaccination commenced on 17 February 2021 for health workers and 17 May 2021 for the general population in age cohorts, starting with those aged  $\geq 60$  years and progressively expanding to younger ages. By 20 October 2021, vaccination was available to all individuals aged  $\geq 12$  years. All SARS-CoV-2 vaccinations administered in the country are recorded on the Electronic Vaccine Data System (EVDS). Vaccination data (dates and types of all SARS-CoV-2 vaccines given at any facility in the province) were obtained using the South African national identifier to link WCPHDC data to EVDS data for a specific individual.

### *Statistical analysis*

We assessed three outcomes: (i) death, (ii) severe hospitalization or death and (iii) any hospitalization or death. We only included outcomes within 14 days of COVID-19 diagnosis to allow for comparable ascertainment across all wave periods. Hospitalization included admission within 14 days before or after a COVID-19 diagnosis except for admissions to long term psychiatric or rehabilitation facilities where the COVID-19 diagnosis was likely to



be incidental. Severe hospitalization was defined as admission to intensive care or mechanical ventilation or oral/intravenous steroid prescription. Deaths within 14 days of COVID-19 diagnosis were included unless a clear non-COVID-19 cause of death was recorded.

We used Cox regression adjusted for age, sex, geographic location, comorbidities, SARS-CoV-2 vaccination and prior diagnosed infection to assess differences in COVID-19 outcomes between waves. Vaccination at the time of COVID-19 diagnosis was defined as “fully” ( $\geq 28$  days post single dose vaccination with Janssen/Johnson & Johnson [Ad26.COV2.S], or  $\geq 14$  days post second dose of Pfizer–BioNTech [BNT162b2]), or “partially” ( $\geq 21$  days after single dose Ad26.COV2.S vaccine or first BNT162b2 dose until meeting criteria for fully vaccinated). Additional booster doses were not considered as these were not widely available except to health care workers and the severely immune compromised. Prior diagnosed infection was defined as  $\geq 1$  laboratory confirmed SARS-CoV-2 diagnosis  $\geq 90$  days previously without an intervening positive test. We used the approach described by Ferguson et al. (18) to assess the extent to which reductions in disease severity during the Omicron period may be attenuated by more unascertained prior infections in those with Omicron compared to patients infected with previous variants. As a base scenario we assumed that immunity conferred by prior infection reduces risk of death, severe hospitalization or death and hospitalization or death by 80%, 80% and 70% respectively, and that only 15% of prior diagnosed infections were ascertained based on seroprevalence and excess death data (12, 30). We then calculated a corrected hazard ratio for wave four vs. wave three using the formula:

$$\text{True } HR_{\text{Omicron:Delta}} = \frac{\text{Observed } HR_{\text{Omicron:Delta}} (1 - (1 - \gamma)(1 - \rho)(\theta_{\text{Delta}}/\rho))}{(1 - (1 - \gamma)(1 - \rho)(\theta_{\text{Omicron}}/\rho))}$$

where  $\gamma$  is the relative risk of the outcome in those with vs. without prior infection,  $\rho$  is the proportion of reinfections detected and  $\theta$  is the observed proportion of reinfections with Delta and Omicron respectively (18). The proportional-hazard assumption (assessed with Schoenfeld residuals) (31) was violated for the effect of wave on the outcome of any hospitalization or death only, as the hazards converged over time. We therefore also show the results of logistic regression for all of the outcomes which were very similar.

In addition, to assess whether protection conferred by prior infection and vaccination was similar in the Omicron and Delta periods, we compared the association between these variables and the three severe COVID-19 outcomes separately for just the wave three and wave four periods. The wave three period was cases diagnosed between 1 September and 15 October 2021 as too few people had been vaccinated during early wave three (26 May to 23 June 2021) since vaccination only commenced for those 60 years and older on 17 May 2021. All analyses were conducted using Stata 17.1.

## Results

We included 5,144 patients diagnosed in wave four and 4,403, 3,902 and 3,304 patients from waves three, two and one respectively (Table 1). There was a greater proportion of patients aged 20-39 years in wave four (64%) compared to waves two (49%) and three (44%). The prevalence of comorbidities was mostly similar across waves, except for HIV-1 which had highest prevalence in wave one, decreased prevalence in waves two and three, but increased prevalence in wave four (Table 1). The proportion with prior diagnosed infection was substantially higher in wave four (11%) compared to waves three (3.2%) or two (1.9%). In wave four, 38% and 5% of all COVID-19 cases were fully or partially vaccinated respectively.

*Comparison of outcomes across waves.*

Overall, 8.0% (409/5,144) of cases were hospitalized or died within 14 days of diagnosis in wave four compared to 16.5% (1918/11,609) across the previous three waves (Table 1). After adjusting for age, sex, comorbidities and subdistrict there was a substantially reduced hazard of death in wave four compared to wave three (adjusted Hazard Ratio [aHR] 0.27; 95% Confidence Interval: 0.19; 0.38) (Table 2). The extent of reduction was attenuated (0.41; 95% CI 0.29; 0.59) when additionally considering prior diagnosed infections and vaccination. Vaccination was strongly protective (aHR for fully vs. not vaccinated 0.20; 95% CI 0.09; 0.43). Wave four was also associated with lower risk of death than waves one and two, which in turn were less severe than wave three (aHR [95% CI] for waves one and two vs wave three were 0.55 [0.40; 0.74] and 0.60 [0.48; 0.74] respectively). The pattern of reduced severity in wave four compared to previous waves was similar for the outcome of severe hospitalization or death, but for the least specific outcome (i.e. any hospitalization or death) the risk reduction in wave four vs. three was smaller. For all outcomes, the reduced risk of the outcome attenuated with adjustment for prior diagnosed infection and vaccination. For example, for the outcome of any hospitalization or death, the risk was lower for wave four vs wave three (aHR 0.72; 95% CI: 0.63; 0.82) and wave two, but greater than wave one (aHR [95%CI] for waves two and one vs wave three: 0.88 [0.80; 0.96] and 0.57 [0.50; 0.66] respectively). Both prior diagnosed COVID-19 (aHR 0.28; 95% CI 0.19; 0.40) and SARS-CoV-2 vaccination were protective (aHR 0.42; 95% CI 0.34; 0.52). Results were very similar when using logistic regression (Supplementary Table 1).

After considering the possible effect of protection against severe outcomes conferred by unascertained prior infection, the reduced risk of severe disease in wave four vs wave three remained but was substantially attenuated with aHR of 0.72 for death and 0.75 for severe hospitalization or death respectively, and the risk of any COVID-19 hospitalization or death

was similar or higher in wave four and wave 3 (aHR: 1.14). Results were sensitive to the extent of protection assumed to be provided from prior infection and the proportion of prior infections assumed to be ascertained (Supplementary Table). For example, there was no difference in risk of severe hospitalization or death in wave three vs. wave four if the assumed proportion of prior infections detected was reduced from 15% to 12%.

*Protection from vaccination and prior infection in waves three and four:*

Amongst COVID-19 cases, protection by vaccination against all outcomes was similar in wave four compared to the prior wave (Figure 2). For example, the aHR (95% CI) for protection against death from full vaccination was 0.35 (0.22; 0.54) in late wave three and 0.24 (0.10; 0.58) in wave four. Similarly, protection conferred by prior diagnosed infection against hospitalization or death was maintained with aHR (95%CI) of 0.32 (0.20; 0.52) in late wave three and 0.13 (0.06; 0.27) during wave four. Protection conferred by prior infection against other severe COVID-19 outcomes was difficult to assess due to very small numbers of patients with prior diagnoses experiencing these outcomes.

## **Discussion**

In this study of Western Cape public sector laboratory confirmed COVID-19 cases, we found a substantial reduction in all severe COVID-19 outcomes in wave four compared to previous waves with 28% (95% CI: 18%; 37%) reduced risk of any hospitalization or death and 59% (95% CI: 41%; 71%) reduced risk of death only after adjusting for vaccination. While some of this reduction is likely due to retained protection conferred by prior SARS-CoV-2 infection against severe disease in Omicron-infected patients, even when accounting for

protection conferred by prior unascertained infections in patients with Omicron, we found approximately 25% reduction in severe hospitalization or death in wave four vs wave three.

Our findings concur with current literature reporting less severe disease associated with Omicron vs. other variants of concern and previous waves (16-20, 32). For example, cases with presumed Omicron infection (identified with S-gene target failure on PCR) were less likely to be admitted to hospital and experience severe outcomes compared to those with delta infections (18, 19, 21) and fewer admissions with less severe outcomes among those hospitalized have been reported in the fourth wave compared to previous waves in South Africa (16, 17). To our knowledge, ours is the first study from a setting of high prior seroprevalence to demonstrate less severe disease in wave four after adjusting for both vaccination and prior diagnosed infection, and to assess the contribution to protection of a greater proportion of unascertained re-infections among Omicron cases compared to other variants. Reassuringly, protection against severe disease conferred by prior infection and vaccination were similar in wave four and wave three. Nonetheless, the fact that even after this protection was considered there was likely reduction of the most severe outcomes in wave four indicates possible reduction in virulence of Omicron. This is supported by laboratory data from several studies demonstrating possible mechanisms of reduced virulence (6-8, 14).

The finding of increased prevalence of HIV-1 in wave four compared to the previous two waves illustrates the importance of adjusting for prior unascertained infections. Poorer urban communities tend to have higher HIV-1 prevalence and so the pattern of decreasing HIV-1 prevalence in the second and third waves, with increased prevalence among fourth wave cases, is unlikely to be due to HIV-1 itself, but because HIV-1 infection is a proxy for living in a community like Khayelitsha subdistrict, with high SARS-CoV-2 seroprevalence by the

end of the first wave, which protected against infection in the two subsequent waves, but less so in wave four.

For the less severe outcome of any hospitalization or death, while risk in wave four was less than wave three, after adjusting for vaccination and prior diagnosed infections it was similar to that of wave one. This is notable as wave three was driven by the Delta variant which has been shown to cause more severe disease than ancestral strains (23-26). Hospitalization risk may appear similar to or higher in wave four compared to earlier waves which were due to less transmissible variants simply due to a higher prevalence of cases during the wave surge together with more widespread testing of asymptomatic hospitalized patients than in previous waves. Notwithstanding, the similarity in risk of admission suggests that in the absence of immunity, Omicron could be as severe as the ancestral strain. Irrespective of virulence and disease severity, the sheer number of admissions in patients during an Omicron wave warrants specific planning around appropriate infection prevention and control measures within hospitals while minimizing adverse impacts on health services for other conditions. Strengths of our study include complete ascertainment of hospitalizations and deaths in all laboratory confirmed COVID-19 cases across a public sector health service and ability to robustly adjust for comorbidities as well as SARS-CoV-2 vaccination. Our analysis also has several limitations. First, we compared outcomes across waves as a proxy for the variant that dominated in each wave, and not in patients with genomically confirmed variants. Second, while health service pressures which impact disease outcomes are likely to be more similar at “equivalent wave periods”, identifying such “equivalent periods” across waves can be challenging. However, results were similar when using slightly different wave periods. Third, adjustment for comorbidities was limited to those algorithmically identified in the WCPHDC and does not include undiagnosed comorbidities and other important risk factors for poor COVID-19 outcomes such as obesity. Fourth, prior diagnosed infections substantially under-

ascertain all prior infections, and while we addressed this by determining the likely impact of undiagnosed infections in wave four, this is based on assumptions. Fifth, we could not distinguish between admissions and deaths where the diagnosis of COVID-19 may have been incidental or contributory rather than causal. However, our main analysis focused on mortality and we found stronger protection of both wave four and vaccination against the more severe outcomes (severe hospitalization and/or death), suggesting that results are robust despite misclassification of admissions with incidental COVID-19. Nonetheless, a different clinical profile of hospitalized and deceased patients with COVID-19 has been reported, with less COVID-19 pneumonia and a greater proportion of patients with severe comorbidities where COVID-19 may be contributory, but not causing typical respiratory presentation (17). We may therefore be underestimating the reduction in risk of hospitalization and death due to COVID-19 pneumonia specifically in the Omicron wave. Sixth, we excluded children as the effects of Omicron on disease severity may differ in children compared to adults, the role of COVID-19 as a cause of pathology in a child admitted with respiratory illness with several different viruses present is unclear, and because we could not assess differences in the more severe outcomes between waves in children as these were so uncommon. Finally, outcomes were limited to 14 days post diagnosis to allow for equivalent follow-up in the most recent vs. previous waves and so we could not compare outcomes beyond 14 days. However, in previous waves only 2.9% of hospitalizations occurred beyond this period and only 2.6% of deaths had not been hospitalized or deceased within 2 weeks of diagnosis.

In conclusion, we found substantially reduced disease severity amongst diagnosed COVID-19 cases in the Omicron-driven fourth wave compared to previous waves. While this could mostly be due to retained protection against severe outcomes conferred by prior infection and vaccination, our data suggests that severe outcomes could be reduced by approximately 25% due to intrinsically reduced virulence of Omicron.

## **Acknowledgements**

We would like to acknowledge all patients in the Western Cape and to thank the Western Cape Department of Health Provincial Health Data Centre, the Western Cape Department of Health COVID-19 Outbreak Response Team, the Western Cape Communicable Disease Control sub-directorate and Western Cape health care workers involved in the COVID-19 response for their contributions to this report. We acknowledge funding for the Western Cape Provincial Health Data Centre from the Western Cape Department of Health, the US National Institutes for Health (R01 HD080465, U01 AI069924), the Bill and Melinda Gates Foundation (1164272, 119327), the United States Agency for International Development (72067418CA00023), the European Union (101045989), the Wellcome Trust (203135/Z/16/Z, 222574) and the Medical Research Council of South Africa. RJW receives support from the Francis Crick Institute which is funded by Wellcome (FC0010218), MRC (UK) (FC0010218) and Cancer Research UK (FC0010218). He also receives support from Wellcome (203135, 222574) and the Medical Research Council of South Africa.



**Figure 1:** Daily new cases (7 day moving average) by days since start of each wave in Khayelitsha sub-district, Cape Town, South Africa.

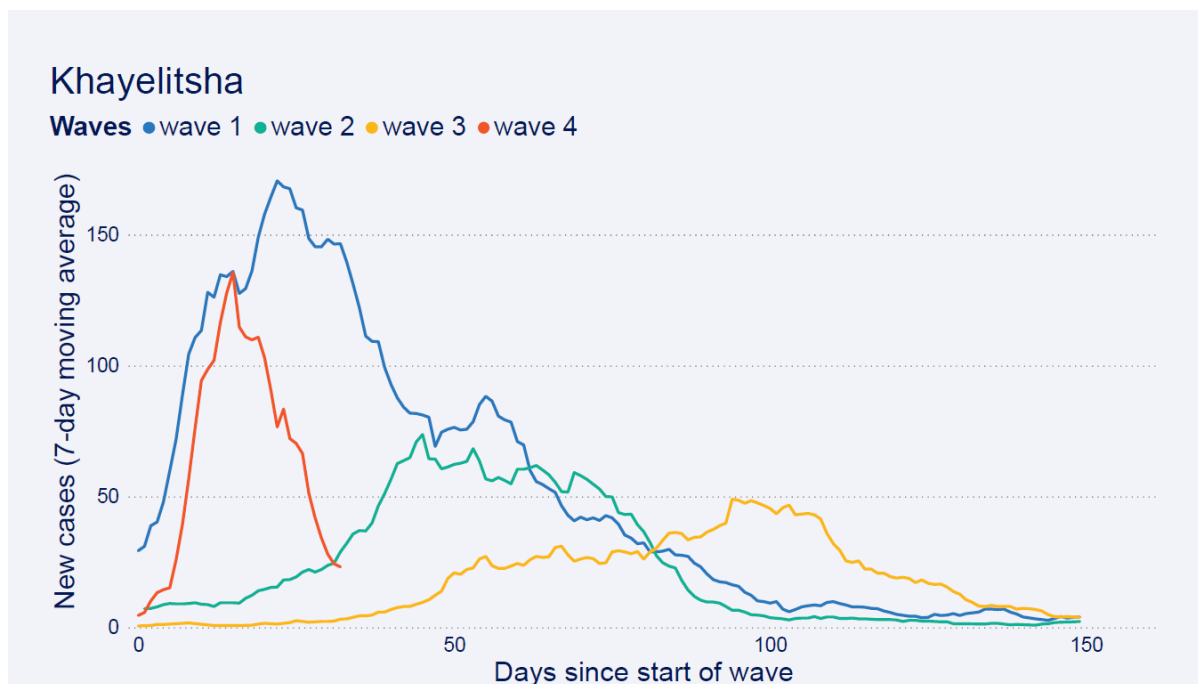

Table 1: Characteristics and outcomes of COVID-19 cases included from each of the four waves in the Western Cape Province, South Africa.

|                                                    | <b>Wave 1</b><br><b>26 Apr to 23 May</b><br><b>2020<sup>§</sup></b><br><b>(n=10,009)</b> | <b>Wave 2</b><br><b>25 Oct to 21 Nov</b><br><b>2020<sup>§</sup></b><br><b>(n=3,722)</b> | <b>Wave 3</b><br><b>26 May to 23 Jun</b><br><b>2021<sup>§</sup></b><br><b>(n=4,355)</b> | <b>Wave 4</b><br><b>14 Nov to 11 Dec</b><br><b>2021<sup>§</sup></b><br><b>(n=5,104)</b> |
|----------------------------------------------------|------------------------------------------------------------------------------------------|-----------------------------------------------------------------------------------------|-----------------------------------------------------------------------------------------|-----------------------------------------------------------------------------------------|
| <b>Male sex</b>                                    | 3,208 (30%)                                                                              | 1,416 (36%)                                                                             | 1,853 (38%)                                                                             | 1,886 (35%)                                                                             |
| <b>Age</b>                                         |                                                                                          |                                                                                         |                                                                                         |                                                                                         |
| <b>20-39 years</b>                                 | 5,864 (59%)                                                                              | 1,801 (48%)                                                                             | 1,899 (44%)                                                                             | 3,285 (64%)                                                                             |
| <b>40-49 years</b>                                 | 1,992 (20%)                                                                              | 734 (20%)                                                                               | 834 (19%)                                                                               | 849 (17%)                                                                               |
| <b>50-59 years</b>                                 | 1,283 (12%)                                                                              | 603 (16%)                                                                               | 783 (18%)                                                                               | 569 (11%)                                                                               |
| <b>60-69 years</b>                                 | 525 (5%)                                                                                 | 352 (9%)                                                                                | 471 (11%)                                                                               | 263 (5%)                                                                                |
| <b>≥70 years</b>                                   | 345 (3.5%)                                                                               | 232 (6%)                                                                                | 368 (8%)                                                                                | 138 (2.7%)                                                                              |
| <b>Non-communicable diseases</b>                   |                                                                                          |                                                                                         |                                                                                         |                                                                                         |
| <b>diabetes</b>                                    | 1416 (13%)                                                                               | 629 (16%)                                                                               | 760 (16%)                                                                               | 407 (7%)                                                                                |
| <b>hypertension</b>                                | 2363 (22%)                                                                               | 905 (23%)                                                                               | 1145 (24%)                                                                              | 836 (15%)                                                                               |
| <b>chronic kidney disease</b>                      | 343 (3.2%)                                                                               | 142 (3.6%)                                                                              | 204 (4.2%)                                                                              | 85 (1.6%)                                                                               |
| <b>chronic pulmonary disease /asthma</b>           | 646 (6%)                                                                                 | 272 (7%)                                                                                | 380 (8%)                                                                                | 418 (8%)                                                                                |
| <b>Tuberculosis</b>                                |                                                                                          |                                                                                         |                                                                                         |                                                                                         |
| <b>previous tuberculosis</b>                       | 831 (8%)                                                                                 | 283 (7%)                                                                                | 283 (6%)                                                                                | 381 (7%)                                                                                |
| <b>current tuberculosis</b>                        | 113 (1.1%)                                                                               | 66 (1.7%)                                                                               | 44 (0.9%)                                                                               | 68 (1.3%)                                                                               |
| <b>HIV positive</b>                                | 1,918 (18%)                                                                              | 530 (13%)                                                                               | 288 (6%)                                                                                | 706 (13%)                                                                               |
| <b>Prior diagnosed infection</b>                   | 0 (0%)                                                                                   | 67 (1.8%)                                                                               | 136 (3.1%)                                                                              | 572 (11%)                                                                               |
| <b>Vaccination</b>                                 |                                                                                          |                                                                                         |                                                                                         |                                                                                         |
| <b>partial*</b>                                    | N/A                                                                                      | N/A                                                                                     | 25 (0.6%)                                                                               | 268 (5%)                                                                                |
| <b>fully*</b>                                      | N/A                                                                                      | N/A                                                                                     | 123 (2.8%)                                                                              | 1,925 (38%)                                                                             |
| <b>Outcomes within 14 days of diagnosis</b>        |                                                                                          |                                                                                         |                                                                                         |                                                                                         |
| <b>admission (not severe; not deceased)</b>        | 846 (8.5%)                                                                               | 366 (9.8%)                                                                              | 382 (9%)                                                                                | 222 (4.4%)                                                                              |
| <b>severe admission (not deceased)<sup>#</sup></b> | not applicable                                                                           | 122 (3.3%)                                                                              | 183 (4.2%)                                                                              | 42 (0.8%)                                                                               |
| <b>death</b>                                       | 291 (2.9%)                                                                               | 131 (3.5%)                                                                              | 250 (6%)                                                                                | 20 (0.4%)                                                                               |

<sup>§</sup>Date of diagnoses for cases included in each wave. We included cases diagnosed from 7 days prior to the wave start (deemed to occur when the week on week % change in new admissions exceeded 10%) and for the following 4 weeks, to allow for at least 2 weeks of follow up in the most recently diagnosed patients in wave 4. \*Fully vaccinated: ≥28 days post-vaccination with Janssen/Johnson & Johnson (Ad26.COV2.S) or ≥14 days post second dose of Pfizer–BioNTech (BNT162b2); Partially vaccinated: ≥21 days after (first) vaccine dose until meeting criteria for fully vaccinated); <sup>#</sup>Admission to an intensive care unit, mechanical ventilation or prescription of oral or intravenous steroids; not reported for wave 1 as steroids not widely used until after 16 June 2020.

Table 2: Associations between different waves and severe COVID-19 outcomes adjusted for patient characteristics, sub-district, vaccination, prior diagnosed infection and unascertained prior infections using Cox regression.

|                                                                       | Outcome = death not adjusted for vaccination and prior infection |              | Outcome = death adjusted for vaccination and prior infection |              | Outcome = severe hospitalization <sup>#</sup> /death not adjusted for vaccination or prior diagnosed infection |              | Outcome = severe hospitalization <sup>#</sup> /death adjusted for vaccination or prior diagnosed infection |              | Outcome = hospitalization/death not adjusted for vaccination and prior infection |            | Outcome = hospitalization/death adjusted for vaccination and prior infection |            |
|-----------------------------------------------------------------------|------------------------------------------------------------------|--------------|--------------------------------------------------------------|--------------|----------------------------------------------------------------------------------------------------------------|--------------|------------------------------------------------------------------------------------------------------------|--------------|----------------------------------------------------------------------------------|------------|------------------------------------------------------------------------------|------------|
|                                                                       | Adjusted <sup>^</sup> HR                                         | 95% CI       | Adjusted HR                                                  | 95% CI       | Adjusted <sup>^</sup> HR                                                                                       | 95% CI       | Adjusted HR                                                                                                | 95% CI       | Adjusted <sup>^</sup> HR                                                         | 95% CI     | Adjusted HR                                                                  | 95% CI     |
| Male sex (vs. female)                                                 | 1.44                                                             | 1.20; 1.73   | 1.45                                                         | 1.21; 1.74   | 1.37                                                                                                           | 1.19; 1.56   | 1.37                                                                                                       | 1.19; 1.57   | 1.15                                                                             | 1.06; 1.24 | 1.14                                                                         | 1.06; 1.23 |
| Age (vs. 20-29 years)                                                 |                                                                  |              |                                                              |              |                                                                                                                |              |                                                                                                            |              |                                                                                  |            |                                                                              |            |
| 40-49 years                                                           | 3.07                                                             | 1.96; 4.80   | 3.18                                                         | 2.03; 4.98   | 2.32                                                                                                           | 1.74; 3.10   | 2.42                                                                                                       | 1.82; 3.24   | 1.14                                                                             | 1.00; 1.29 | 1.17                                                                         | 1.03; 1.33 |
| 50-59 years                                                           | 7.35                                                             | 4.88; 11.06  | 7.64                                                         | 5.07; 11.52  | 4.74                                                                                                           | 3.66; 6.12   | 4.96                                                                                                       | 3.82; 6.42   | 1.90                                                                             | 1.68; 2.15 | 1.96                                                                         | 1.73; 2.21 |
| 60-69 years                                                           | 17.17                                                            | 11.31; 26.05 | 18.11                                                        | 11.92; 27.52 | 8.51                                                                                                           | 6.52; 11.11  | 8.85                                                                                                       | 6.77; 11.58  | 2.94                                                                             | 2.57; 3.36 | 3.01                                                                         | 2.63; 3.45 |
| ≥70 years                                                             | 30.94                                                            | 20.10; 47.62 | 34.22                                                        | 22.22; 52.68 | 13.56                                                                                                          | 10.30; 17.85 | 14.39                                                                                                      | 10.91; 18.98 | 4.25                                                                             | 3.70; 4.89 | 4.40                                                                         | 3.83; 5.06 |
| Comorbidities (vs. comorbidity absent)                                |                                                                  |              |                                                              |              |                                                                                                                |              |                                                                                                            |              |                                                                                  |            |                                                                              |            |
| diabetes                                                              | 1.97                                                             | 1.60; 2.41   | 1.95                                                         | 1.58; 2.39   | 1.76                                                                                                           | 1.51; 2.05   | 1.77                                                                                                       | 1.51; 2.06   | 2.22                                                                             | 2.02; 2.44 | 2.26                                                                         | 2.06; 2.48 |
| hypertension                                                          | 1.06                                                             | 0.87; 1.30   | 1.05                                                         | 0.86; 1.28   | 1.01                                                                                                           | 0.87; 1.18   | 1.00                                                                                                       | 0.86; 1.17   | 1.11                                                                             | 1.01; 1.21 | 1.10                                                                         | 1.0; 1.20  |
| chronic kidney disease                                                | 2.04                                                             | 1.60; 2.60   | 2.07                                                         | 1.63; 2.63   | 1.73                                                                                                           | 1.43; 2.09   | 1.73                                                                                                       | 1.43; 2.09   | 1.71                                                                             | 1.52; 1.92 | 1.70                                                                         | 1.52; 1.91 |
| chronic pulmonary disease / asthma                                    | 1.24                                                             | 0.97; 1.59   | 1.24                                                         | 0.97; 1.59   | 1.44                                                                                                           | 1.20; 1.73   | 1.46                                                                                                       | 1.21; 1.75   | 1.24                                                                             | 1.11; 1.39 | 1.27                                                                         | 1.13; 1.42 |
| previous tuberculosis                                                 | 1.70                                                             | 1.24; 2.33   | 1.68                                                         | 1.22; 2.29   | 1.39                                                                                                           | 1.09; 1.78   | 1.38                                                                                                       | 1.08; 1.76   | 1.17                                                                             | 1.02; 1.34 | 1.16                                                                         | 1.01; 1.33 |
| current tuberculosis                                                  | 2.24                                                             | 1.19; 4.21   | 2.09                                                         | 1.11; 3.91   | 3.13                                                                                                           | 2.10; 4.67   | 2.99                                                                                                       | 2.01; 4.47   | 3.25                                                                             | 2.63; 4.03 | 3.24                                                                         | 2.63; 3.99 |
| HIV                                                                   | 1.88                                                             | 1.36; 2.58   | 1.92                                                         | 1.40; 2.64   | 1.49                                                                                                           | 1.16; 1.92   | 1.53                                                                                                       | 1.19; 1.96   | 1.58                                                                             | 1.40; 1.78 | 1.61                                                                         | 1.43; 1.81 |
| Prior diagnosed infection (vs. None)                                  |                                                                  |              |                                                              |              |                                                                                                                |              |                                                                                                            |              |                                                                                  |            |                                                                              |            |
| Yes (vs none)                                                         |                                                                  |              | 1.10                                                         | 0.63; 1.92   |                                                                                                                |              | 0.60                                                                                                       | 0.37; 0.98   |                                                                                  |            | 0.28                                                                         | 0.19; 0.40 |
| Vaccination (vs. None)                                                |                                                                  |              |                                                              |              |                                                                                                                |              |                                                                                                            |              |                                                                                  |            |                                                                              |            |
| partial <sup>*</sup>                                                  |                                                                  |              | 1.19                                                         | 0.66; 2.15   |                                                                                                                |              | 1.26                                                                                                       | 0.81; 1.95   |                                                                                  |            | 0.89                                                                         | 0.66; 1.20 |
| full <sup>*</sup>                                                     |                                                                  |              | 0.20                                                         | 0.09; 0.43   |                                                                                                                |              | 0.23                                                                                                       | 0.13; 0.39   |                                                                                  |            | 0.42                                                                         | 0.34; 0.52 |
| "Wave period"                                                         |                                                                  |              |                                                              |              |                                                                                                                |              |                                                                                                            |              |                                                                                  |            |                                                                              |            |
| early wave 1                                                          | 0.59                                                             | 0.43; 0.81   | 0.55                                                         | 0.40; 0.77   |                                                                                                                |              |                                                                                                            |              | 0.60                                                                             | 0.53; 0.69 | 0.57                                                                         | 0.50; 0.66 |
| early wave 2                                                          | 0.64                                                             | 0.52; 0.80   | 0.60                                                         | 0.48; 0.74   | 0.74                                                                                                           | 0.64; 0.85   | 0.71                                                                                                       | 0.61; 0.83   | 0.91                                                                             | 0.83; 0.99 | 0.88                                                                         | 0.80; 0.96 |
| early wave 3                                                          | Ref                                                              | Ref          |                                                              |              | Ref                                                                                                            | Ref          | Ref                                                                                                        | Ref          | Ref                                                                              | Ref        | Ref                                                                          | Ref        |
| early wave 4                                                          | 0.27                                                             | 0.19; 0.38   | 0.41                                                         | 0.29; 0.59   | 0.28                                                                                                           | 0.22; 0.36   | 0.43                                                                                                       | 0.33; 0.55   | 0.51                                                                             | 0.46; 0.58 | 0.72                                                                         | 0.63; 0.82 |
| early wave 4 accounting for undiagnosed prior infections <sup>§</sup> |                                                                  |              | 0.72                                                         |              |                                                                                                                |              | 0.75                                                                                                       |              |                                                                                  |            | 1.14                                                                         |            |

\*Fully vaccinated: ≥28 days post-vaccination with Janssen/Johnson & Johnson (Ad26.COV2.S) or ≥14 days post second dose of Pfizer–BioNTech (BNT162b2); Partially vaccinated: ≥21 days after (first) vaccine dose until meeting criteria for fully vaccinated); <sup>#</sup>Admission to an intensive care unit, mechanical ventilation or prescription of oral or intravenous steroids; not reported for wave 1 as steroids not widely used until after 16 June 2020. <sup>^</sup>Adjusted for all variables shown in the table as well as subdistrict/district, but not for vaccination or prior diagnosed infection; <sup>§</sup>We calculated the "true hazard ratio" for severity of wave 4 vs wave 3 using the approach described by Ferguson et al. (18), assuming prior infection reduces risk of death, severe admission or death and admission or death by 80%, 80% and 70% respectively, and that 15% of prior diagnosed infections were ascertained. aHR = adjusted Hazard Ratio; CI = Confidence Interval

Figure 2: Adjusted hazard ratio for associations between a) vaccination and b) prior diagnosed infection and different severe COVID-19 outcomes adjusted for patient characteristics, subdistrict, vaccination, and prior diagnosed infection using Cox regression.

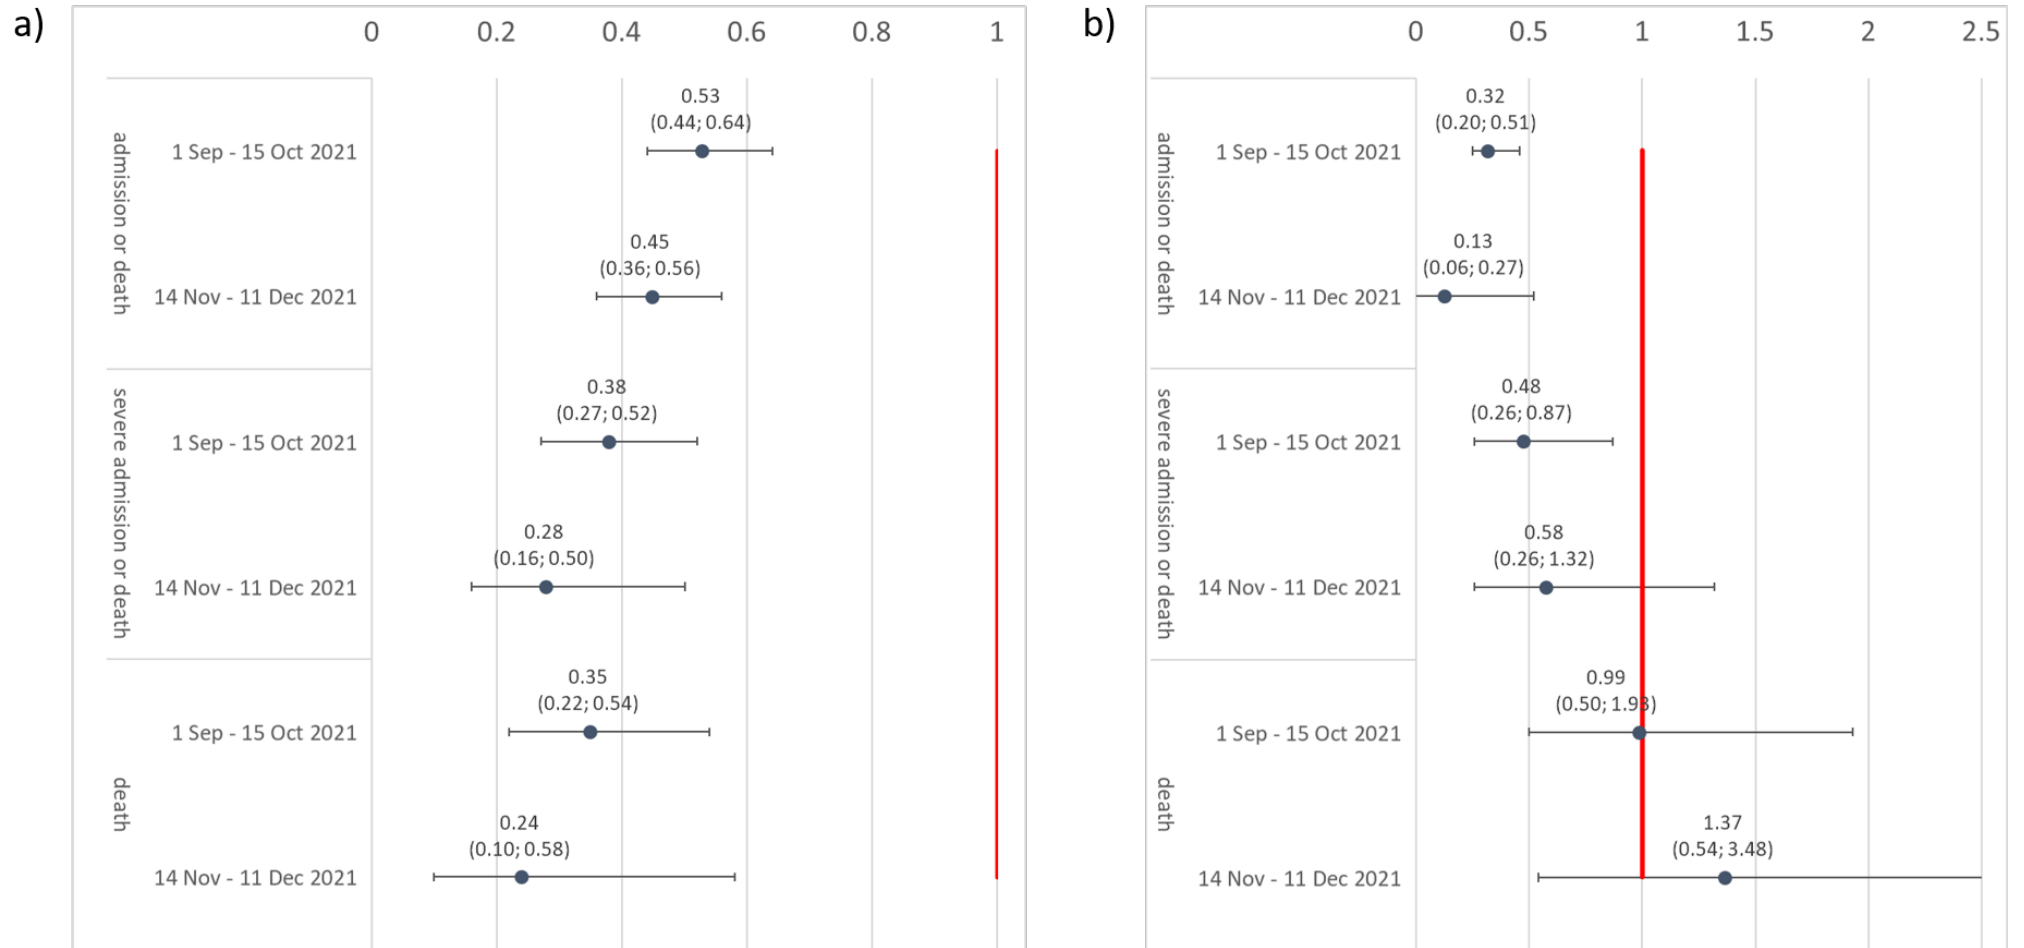

**Supplementary Table 1:** Associations between different waves and severe COVID-19 outcomes adjusted for patient characteristics, sub-district, vaccination and prior diagnosed infection using logistic regression.

|                                               | Outcome = death not adjusted for vaccination and prior infection |              | Outcome = death adjusted for vaccination and prior infection |              | Outcome = severe hospitalization#/death not adjusted for vaccination or prior diagnosed infection |              | Outcome = severe hospitalization#/death adjusted for vaccination or prior diagnosed infection |              | Outcome = hospitalization/death not adjusted for vaccination and prior infection |            | Outcome = hospitalization/death adjusted for vaccination and prior infection |            |
|-----------------------------------------------|------------------------------------------------------------------|--------------|--------------------------------------------------------------|--------------|---------------------------------------------------------------------------------------------------|--------------|-----------------------------------------------------------------------------------------------|--------------|----------------------------------------------------------------------------------|------------|------------------------------------------------------------------------------|------------|
|                                               | Adjusted <sup>a</sup> OR                                         | 95% CI       | Adjusted OR                                                  | 95% CI       | Adjusted <sup>a</sup> OR                                                                          | 95% CI       | Adjusted OR                                                                                   | 95% CI       | Adjusted <sup>a</sup> OR                                                         | 95% CI     | Adjusted OR                                                                  | 95% CI     |
| <b>Male sex (vs. female)</b>                  | 1.53                                                             | 1.26; 1.88   | 1.56                                                         | 1.27; 1.90   | 1.47                                                                                              | 1.25; 1.73   | 1.47                                                                                          | 1.24; 1.73   | 1.21                                                                             | 1.10; 1.34 | 1.20                                                                         | 1.08; 1.33 |
| <b>Age (vs. 20-39 years)</b>                  |                                                                  |              |                                                              |              |                                                                                                   |              |                                                                                               |              |                                                                                  |            |                                                                              |            |
| <b>40-49 years</b>                            | 2.99                                                             | 1.91; 4.71   | 3.09                                                         | 1.96; 4.86   | 2.30                                                                                              | 1.71; 3.10   | 2.40                                                                                          | 1.78; 3.24   | 1.08                                                                             | 0.93; 1.25 | 1.12                                                                         | 0.96; 1.29 |
| <b>50-59 years</b>                            | 7.18                                                             | 4.73; 10.89  | 7.44                                                         | 4.89; 11.31  | 4.84                                                                                              | 3.69; 6.35   | 5.07                                                                                          | 3.85; 6.67   | 1.92                                                                             | 1.66; 2.22 | 1.99                                                                         | 1.72; 2.31 |
| <b>60-69 years</b>                            | 17.43                                                            | 11.36; 26.76 | 18.42                                                        | 11.98; 28.31 | 9.35                                                                                              | 6.99; 12.49  | 9.76                                                                                          | 7.28; 13.08  | 3.38                                                                             | 2.85; 4.01 | 3.52                                                                         | 2.96; 4.19 |
| <b>≥70 years</b>                              | 35.14                                                            | 22.57; 54.72 | 39.44                                                        | 25.29; 61.50 | 17.43                                                                                             | 12.86; 23.63 | 18.79                                                                                         | 13.80; 25.59 | 6.53                                                                             | 5.39; 7.91 | 6.90                                                                         | 5.67; 8.40 |
| <b>Comorbidities (vs. comorbidity absent)</b> |                                                                  |              |                                                              |              |                                                                                                   |              |                                                                                               |              |                                                                                  |            |                                                                              |            |
| <b>diabetes</b>                               | 2.13                                                             | 1.71; 2.67   | 2.12                                                         | 1.69; 2.66   | 2.02                                                                                              | 1.68; 2.43   | 2.03                                                                                          | 1.68; 2.45   | 3.06                                                                             | 2.70; 3.47 | 3.16                                                                         | 2.79; 3.59 |
| <b>hypertension</b>                           | 1.07                                                             | 0.86; 1.34   | 1.06                                                         | 0.85; 1.32   | 1.00                                                                                              | 0.83; 1.21   | 0.99                                                                                          | 0.82; 1.19   | 1.12                                                                             | 0.99; 1.26 | 1.11                                                                         | 0.98; 1.25 |
| <b>chronic kidney disease</b>                 | 2.33                                                             | 1.75; 3.09   | 2.38                                                         | 1.79; 3.16   | 2.20                                                                                              | 1.69; 2.87   | 2.19                                                                                          | 1.68; 2.85   | 3.04                                                                             | 2.42; 3.82 | 3.01                                                                         | 2.39; 3.80 |
| <b>chronic pulmonary disease / asthma</b>     | 1.32                                                             | 0.99; 1.76   | 1.33                                                         | 1.0; 1.78    | 1.64                                                                                              | 1.29; 2.08   | 1.67                                                                                          | 1.31; 2.12   | 1.41                                                                             | 1.19; 1.67 | 1.46                                                                         | 1.23; 1.73 |
| <b>previous tuberculosis</b>                  | 1.73                                                             | 1.23; 2.43   | 1.70                                                         | 1.21; 2.40   | 1.45                                                                                              | 1.09; 1.94   | 1.44                                                                                          | 1.08; 1.92   | 1.23                                                                             | 1.03; 1.46 | 1.20                                                                         | 1.01; 1.44 |
| <b>current tuberculosis</b>                   | 2.48                                                             | 1.21; 5.10   | 2.30                                                         | 1.12; 4.74   | 4.06                                                                                              | 2.42; 6.82   | 3.82                                                                                          | 2.28; 6.39   | 5.02                                                                             | 3.65; 6.89 | 4.92                                                                         | 3.58; 6.75 |
| <b>HIV</b>                                    | 1.98                                                             | 1.41; 2.80   | 2.04                                                         | 1.45; 2.87   | 1.60                                                                                              | 1.21; 2.13   | 1.64                                                                                          | 1.24; 2.17   | 1.74                                                                             | 1.50; 2.01 | 1.77                                                                         | 1.53; 2.05 |
| <b>Prior diagnosed infection vs. none</b>     |                                                                  |              |                                                              |              |                                                                                                   |              |                                                                                               |              |                                                                                  |            |                                                                              |            |
| <b>Yes (vs none)</b>                          |                                                                  |              | 1.14                                                         | 0.61; 2.11   |                                                                                                   |              | 0.59                                                                                          | 0.34; 1.03   |                                                                                  |            | 0.22                                                                         | 0.14; 0.34 |
| <b>Vaccination vs. none</b>                   |                                                                  |              |                                                              |              |                                                                                                   |              |                                                                                               |              |                                                                                  |            |                                                                              |            |
| <b>partial*</b>                               |                                                                  |              | 1.25                                                         | 0.60; 2.61   |                                                                                                   |              | 1.43                                                                                          | 0.79; 2.59   |                                                                                  |            | 0.87                                                                         | 0.57; 1.32 |
| <b>full*</b>                                  |                                                                  |              | 0.19                                                         | 0.08; 0.42   |                                                                                                   |              | 0.21                                                                                          | 0.12; 0.37   |                                                                                  |            | 0.36                                                                         | 0.28; 0.46 |
| <b>"Wave period"</b>                          |                                                                  |              |                                                              |              |                                                                                                   |              |                                                                                               |              |                                                                                  |            |                                                                              |            |
| <b>early wave 1</b>                           | 0.56                                                             | 0.39; 0.79   | 0.52                                                         | 0.37; 0.74   | Not reported <sup>#</sup>                                                                         |              | Not reported <sup>#</sup>                                                                     |              | 0.50                                                                             | 0.43; 0.59 | 0.48                                                                         | 0.40; 0.56 |
| <b>early wave 2</b>                           | 0.61                                                             | 0.48; 0.77   | 0.56                                                         | 0.44; 0.71   | 0.69                                                                                              | 0.57; 0.82   | 0.66                                                                                          | 0.55; 0.79   | 0.86                                                                             | 0.76; 0.98 | 0.84                                                                         | 0.74; 0.95 |
| <b>early wave 3</b>                           |                                                                  |              |                                                              |              |                                                                                                   |              |                                                                                               |              |                                                                                  |            |                                                                              |            |
| <b>early wave 4</b>                           | 0.25                                                             | 0.17; 0.36   | 0.38                                                         | 0.26; 0.55   | 0.24                                                                                              | 0.19; 0.31   | 0.37                                                                                          | 0.28; 0.50   | 0.43                                                                             | 0.37; 0.50 | 0.65                                                                         | 0.55; 0.76 |

\*Fully vaccinated: ≥28 days post-vaccination with Janssen/Johnson & Johnson (Ad26.COV2.S) or ≥14 days post second dose of Pfizer–BioNTech (BNT162b2); Partially vaccinated: ≥21 days after (first) vaccine dose until meeting criteria for fully vaccinated); <sup>#</sup>Admission to an intensive care unit, mechanical ventilation or prescription of oral or intravenous steroids; not reported for wave 1 as steroids not widely used until after 16 June 2020. <sup>a</sup>Adjusted for all variables shown in the table as well as subdistrict/district, but not for vaccination or prior diagnosed infection; aOR = adjusted Odds Ratio; CI = Confidence Interval

**Supplementary Table 2:** Range of possible values for the true hazard ratio for the association between wave four (vs. wave three) and each COVID-19 outcome for different assumptions of the protection that prior infection provides against the outcome and the proportion of reinfections detected among cases diagnosed during the fourth wave.

| Relative risk of outcome in those with vs. without prior infection | Outcome = death;<br>Observed aHR: 0.41 (95%CI: 0.29; 0.59) |             |             |             |             | Outcome = severe admission/death;<br>Observed aHR: 0.43 (95%CI: 0.33; 0.55) |             |             |             |             | Outcome = admission or death;<br>Observed aOR: 0.72 (95%CI:0.63; 0.82) |             |             |             |             |             |
|--------------------------------------------------------------------|------------------------------------------------------------|-------------|-------------|-------------|-------------|-----------------------------------------------------------------------------|-------------|-------------|-------------|-------------|------------------------------------------------------------------------|-------------|-------------|-------------|-------------|-------------|
|                                                                    | 0.10                                                       | 0.15        | 0.20        | 0.25        | 0.30        | 0.10                                                                        | 0.15        | 0.20        | 0.25        | 0.30        | 0.20                                                                   | 0.25        | 0.30        | 0.35        | 0.40        |             |
| <b>Proportion of reinfections detected</b>                         | <b>0.12</b>                                                | 1.27        | 1.11        | 0.99        | 0.89        | 0.82                                                                        | 1.33        | 1.16        | 1.04        | 0.94        | 0.86                                                                   | 1.74        | 1.57        | 1.43        | 1.32        | 1.23        |
| <b>Proportion of reinfections detected</b>                         | <b>0.15</b>                                                | 0.81        | 0.76        | 0.72        | 0.68        | 0.65                                                                        | 0.85        | 0.80        | 0.75        | 0.71        | 0.68                                                                   | 1.26        | 1.20        | 1.14        | 1.09        | 1.04        |
| <b>Proportion of reinfections detected</b>                         | <b>0.20</b>                                                | 0.61        | 0.59        | 0.58        | 0.56        | 0.55                                                                        | 0.64        | 0.62        | 0.60        | 0.59        | 0.57                                                                   | 1.01        | 0.98        | 0.96        | 0.93        | 0.91        |
| <b>Proportion of reinfections detected</b>                         | <b>0.25</b>                                                | 0.54        | 0.53        | 0.52        | 0.51        | 0.50                                                                        | 0.57        | 0.55        | 0.54        | 0.54        | 0.53                                                                   | 0.91        | 0.90        | 0.88        | 0.87        | 0.85        |
| <b>Observed reinfections during wave4 (proxy for omicron)</b>      | <b>0.11</b>                                                | <b>0.11</b> | <b>0.11</b> | <b>0.11</b> | <b>0.11</b> | <b>0.11</b>                                                                 | <b>0.11</b> | <b>0.11</b> | <b>0.11</b> | <b>0.11</b> | <b>0.11</b>                                                            | <b>0.11</b> | <b>0.11</b> | <b>0.11</b> | <b>0.11</b> | <b>0.11</b> |

aHR = adjusted Hazard Ratio; CI = confidence interval

## References

1. Scott L, Hsiao N-y, Moyo S, Singh L, Tegally H, Dor G, et al. Track Omicron's spread with molecular data. *Science*. 2021;374(6574):1454-5.
2. Viana R, Moyo S, Amoako DG, Tegally H, Scheepers C, Althaus CL, et al. Rapid epidemic expansion of the SARS-CoV-2 Omicron variant in southern Africa. *medRxiv*. 2021:
3. Cele S, Jackson L, Khan K, Khoury DS, Moyo-Gwete T, Tegally H, et al. SARS-CoV-2 Omicron has extensive but incomplete escape of Pfizer BNT162b2 elicited neutralization and requires ACE2 for infection. *MedRxiv*. 2021. doi: 10.1101/2021.12.19.21268028. Accessed 31 December 2021.
4. Pearson CAB, Silal SP, Li MWZ, Dushoff J, Bolker BM, Abbott S, et al. Bounding the levels of transmissibility and immune evasion of the Omicron variant in South Africa. *MedRxiv*. 2021. doi: 10.1101/2021.12.19.21268038. Accessed 31 December 2021.
5. Pulliam JRC, van Schalkwyk C, Govender N, von Gottberg A, Cohen C, Groome MJ, et al. Increased risk of SARS-CoV-2 reinfection associated with emergence of the Omicron variant in South Africa. *MedRxiv*. 2021. doi: 10.1101/2021.11.11.21266068. Accessed 16 December 2021.
6. Peacock TP, Brown JC, Zhou J, Thakur N, Newman J, Kugathasan R, et al. The SARS-CoV-2 variant, Omicron, shows rapid replication in human primary nasal epithelial cultures and efficiently uses the endosomal route of entry. *BioRxiv*. 2021. 10.1101/2021.12.31.474653. Accessed 10 January 2022.
7. Willett BJ, Grove J, MacLean OA, Wilkie C, Logan N, Lorenzo GD, et al. The hyper-transmissible SARS-CoV-2 Omicron variant exhibits significant antigenic change, vaccine escape and a switch in cell entry mechanism. *MedRxiv*. 2022. 10.1101/2022.01.03.21268111. Accessed 10 January 2022.
8. Abdelnabi R, Foo CS, Zhang X, Lemmens V, Maes P, Slechten B, et al. The omicron (B.1.1.529) SARS-CoV-2 variant of concern does not readily infect Syrian hamsters. *BioRxiv*. 2021. 10.1101/2022.01.03.21268111. Accessed 6 January 2022.
9. Jassat W, Mudara C, Ozougwu L, Tempia S, Blumberg L, Davies MA, et al. Difference in mortality among individuals admitted to hospital with COVID-19 during the first and second waves in South Africa: a cohort study. *The Lancet Global health*. 2021;9(9):e1216-e25.
10. Western Cape Department of Health in collaboration with the National Institute for Communicable Diseases SA. Risk Factors for Coronavirus Disease 2019 (COVID-19) Death in a Population Cohort Study from the Western Cape Province, South Africa. *Clinical Infectious Diseases*. 2020;73(7):e2005-e15.
11. Hsiao M, Davies MA, Kalk E, Hardie D, Naidoo M, Centner C, et al. SARS-CoV-2 seroprevalence in the Cape Town metropolitan sub-districts after the peak of infections 2020 [Available from: [https://www.nicd.ac.za/wp-content/uploads/2020/09/COVID-19-Special-Public-Health-Surveillance-Bulletin\\_Issue-5.pdf](https://www.nicd.ac.za/wp-content/uploads/2020/09/COVID-19-Special-Public-Health-Surveillance-Bulletin_Issue-5.pdf).] Accessed 7 January 2022.
12. Madhi SA, Kwatra G, Myers JE, Jassat W, Dhar N, Mukendi CK, et al. South African Population Immunity and Severe Covid-19 with Omicron Variant. *MedRxiv*. 2021 doi: 10.1101/2021.12.20.21268096. Accessed 31 December 2021.

13. Hussey H, Zinyakatira N, Morden E, Ismail M, Paleker M, Bam JL, et al. Higher COVID-19 mortality in low-income communities in the City of Cape Town - a descriptive ecological study. *Gates Open Res.* 2021;5:90.
14. Meng B, Ferreira IATM, Abdullahi A, Saito A, Kimura I, Yamasoba D, et al. SARS-CoV-2 Omicron spike mediated immune escape, infectivity and cell-cell fusion. *BioRxiv.* 2021. doi: 10.1101/2021.12.17.473248. Accessed 10 January 2022.
15. University of Hong Kong. HKUMed finds Omicron SARS-CoV-2 can infect faster and better than Delta in human bronchus but with less severe infection in lung 2021 [Available from: [https://www.med.hku.hk/en/news/press/20211215-omicron-sars-cov-2-infection?utm\\_medium=social&utm\\_source=twitter&utm\\_campaign=press\\_release](https://www.med.hku.hk/en/news/press/20211215-omicron-sars-cov-2-infection?utm_medium=social&utm_source=twitter&utm_campaign=press_release).] Accessed 31 December 2021.
16. Jassat W, Karim S, Mudara C, Welch R, Ozougwu L, Groome M, et al. Clinical Severity of COVID-19 Patients Admitted to Hospitals in Gauteng, South Africa During the Omicron-Dominant Fourth Wave. *Lancet Preprints.* 2021. [Available at: <http://dx.doi.org/10.2139/ssrn.3996320>. Accessed 31 December 2021]
17. Maslo C, Friedland R, Toubkin M, Laubscher A, Akaloo T, Kama B. Characteristics and Outcomes of Hospitalized Patients in South Africa During the COVID-19 Omicron Wave Compared With Previous Waves. *JAMA.* 2021. doi: 10.1001/jama.2021.24868. Accessed 31 December 2021.
18. Ferguson N, Ghani A, Hinsley W, Volz E. Hospitalisation risk for Omicron cases in England. [Available from: <https://www.imperial.ac.uk/media/imperial-college/medicine/mrc-gida/2021-12-22-COVID19-Report-50.pdf>.] Accessed 31 December 2021.
19. Wolter N, Jassat W, Walaza S, Welch R, Moultrie H, Groome M, et al. Early assessment of the clinical severity of the SARS-CoV-2 Omicron variant in South Africa. *MedRxiv.* doi: 10.1101/2021.12.21.21268116. Accessed 31 December 2021.
20. Wang L, Berger NA, Kaelber DC, Davis PB, Volkow ND, Xu R. Comparison of outcomes from COVID infection in pediatric and adult patients before and after the emergence of Omicron. *medRxiv.* 2022. doi: 10.1101/2021.12.30.21268495. Accessed 12 January 2022.
21. Michael D, Peter H, Tadashi M, Kiyoko I-H, Shun I, Maki K, et al. *Nature Portfolio.* 2022.
22. South African National Department of Health. Latest Vaccine Statistics [Available from: <https://sacoronavirus.co.za/latest-vaccine-statistics/>] Accessed 31 December 2021.
23. Bager P, Wohlfahrt J, Rasmussen M, Albertsen M, Krause TG. Hospitalisation associated with SARS-CoV-2 delta variant in Denmark. *Lancet Infect Dis.* 2021;21(10):1351.
24. Hussey H, Davies M-A, Heekes A, Williamson C, Valley-Omar Z, Hardie D, et al. Higher mortality associated with the SARS-CoV-2 Delta variant in the Western Cape, South Africa, using RdRp target delay as a proxy. *medRxiv.* 2021. doi: 10.1101/2021.10.23.21265412. Accessed 31 December 2021.
25. Ong SWX, Chiew CJ, Ang LW, Mak TM, Cui L, Toh M, et al. Clinical and virological features of SARS-CoV-2 variants of concern: a retrospective cohort study comparing B.1.1.7 (Alpha), B.1.315 (Beta), and B.1.617.2 (Delta). *Clinical Infectious Diseases* 2021. doi: 10.1093/cid/ciab721. Accessed 10 January 2021.



26. Twohig KA, Nyberg T, Zaidi A, Thelwall S, Sinnathamby MA, Aliabadi S, et al. Hospital admission and emergency care attendance risk for SARS-CoV-2 delta (B.1.617.2) compared with alpha (B.1.1.7) variants of concern: a cohort study. *Lancet Infect Dis.* 2022;22(1):35-42.
27. Bhattacharyya R, Hanage W. Challenges in inferring intrinsic severity of SARS-CoV-2 Omicron variant from early population-level impact 2021 [Available from: [https://cdn1.sph.harvard.edu/wp-content/uploads/sites/2623/2021/12/21\\_Hanage\\_Bhattacharyya\\_Challenges-in-assessing-Omicron-severity\\_HCPDS-Working-Paper-Volume-21\\_No-10-1.pdf](https://cdn1.sph.harvard.edu/wp-content/uploads/sites/2623/2021/12/21_Hanage_Bhattacharyya_Challenges-in-assessing-Omicron-severity_HCPDS-Working-Paper-Volume-21_No-10-1.pdf).} Accessed 31 December 2021.
28. Western Cape Department of Health. Western Cape Burden of Disease Rapid Review Update 2019 2020 [Available from: [https://www.westerncape.gov.za/assets/departments/health/burden\\_of\\_disease\\_report\\_2020.pdf](https://www.westerncape.gov.za/assets/departments/health/burden_of_disease_report_2020.pdf).] Accessed 20 February 2020.
29. Boulle A, Heekes A, Tiffin N, Smith M, Mutemaringa T, Zinyakatira N, et al. Data Centre Profile: The Provincial Health Data Centre of the Western Cape Province, South Africa. *International Journal of Population Data Science.* 2019;4(2).
30. Kleynhans J, Tempia S, Wolter N, von Gottberg A, Bhiman JN, Buys A, et al. SARS-CoV-2 Seroprevalence in a Rural and Urban Household Cohort during First and Second Waves of Infections, South Africa, July 2020-March 2021. *Emerg Infect Dis.* 2021;27(12):3020-9.
31. Schoenfeld D. Partial residuals for the proportional 5. hazards regression model. *Biometrika.* 1982;69:239-41.
